# Supplementary material for: An impact resistant hydrogel enabled by bicontinuous phase structure and hierarchical energy dissipation
Source: Royal Society of Chemistry journal article supplement (doi:10.1039/d2tb01693a), 2022-12-15
Supplement: d2tb01693a1.pdf [file d2tb01693a1.pdf]

## Supporting information

### **An impact resistant hydrogel enabled by bicontinuous phase structure and hierarchical energy dissipation**

Yan Qiu, Liang Wu, Sijun Liu,\* Wei Yu\*

Advanced Rheology Institute, Department of Polymer Science and Engineering

Frontiers Science Center for Transformative Molecules, Shanghai Jiao Tong University

Shanghai 200240, P. R. China

E-mail: [liusijun@sjtu.edu.cn](mailto:liusijun@sjtu.edu.cn); [wyu@sjtu.edu.cn](mailto:wyu@sjtu.edu.cn)

## 12 **Synthesis of hydrogels for comparison in impact resistance:**

13 **Alginate/PAAm double network hydrogel:** The sodium alginate and acrylamide powders  
14 were stirred and dissolved in DI water to form a homogeneous solution. Subsequently, the  
15 aqueous solution of 3wt%  $\text{CaSO}_4 \cdot 2\text{H}_2\text{O}$  was added under vigorous stirring. Finally, the above  
16 solution was poured into PTFE mold and polymerized under UV light for 120 min to obtain  
17 Alginate/PAAm double network hydrogels.<sup>1</sup>

18 **PAMPS/PAAm double network hydrogel:** PAMPS/PAAm double network (DN) hydrogels  
19 were synthesized by two-step methods. The aqueous solution containing 1M 2-acrylamido-2-  
20 methylpropanesulfonic acid (AMPS), 4mol% N,N'-methylenebis(acrylamide) (MBAA) and  
21 0.1mol% 2-oxodlutaric relative to the amount of AMPS was polymerized under UV for 120  
22 min. Then, the obtained PAMPS hydrogel was immersed in the aqueous solution containing  
23 2M AAm, 0.1mol% MBAA and 0.1 mol% 2-oxodlutaric relative to the amount of acrylamide  
24 (AAm) for 24 h. The immersed PAMPS sample was moved into UV light to polymerize AAm,  
25 and further form the PAMPS/PAAm double network hydrogel.<sup>2</sup>

26 **PVA hydrogel:** 4g Poly(vinyl alcohol) (PVA) was added in 40 mL DI water and the solution  
27 was heated at 100°C for 6h under stirring to form a homogeneous solution. PVA hydrogel was  
28 obtained by immersing the PVA aqueous solution in liquid nitrogen until it was completely  
29 frozen, and then thawing at room temperature for about 3 hours. This freeze-thaw cycle was  
30 repeated three times, then the PVA hydrogel was prepared.<sup>3</sup>

31 **Polyampholyte (PA) hydrogels:** Polyampholyte hydrogel were prepared by the  
32 polymerization of Sodium p-styrenesulphonate (NaSS) and (methacryloylamino)propyl-  
33 trimethylammonium chloride (MPTC). The prepolymer solution contained 2.5M monomers  
34 (molar fraction=0.52:0.48), 0.25 mol% APS and 0.1mol% MBAA (relative to the total  
35 monomer molar concentration). In addition, 0.5M NaCl was poured to obtain transparent  
36 solution. The polymerization was finished at 60 °C for 6h, followed by dialysis with deionized  
37 water for 1 week.<sup>4</sup>

38 These hydrogels were prepared as cylinders with a height of 2.5 mm and a diameter of 5 mm  
39 for SHPB tests.

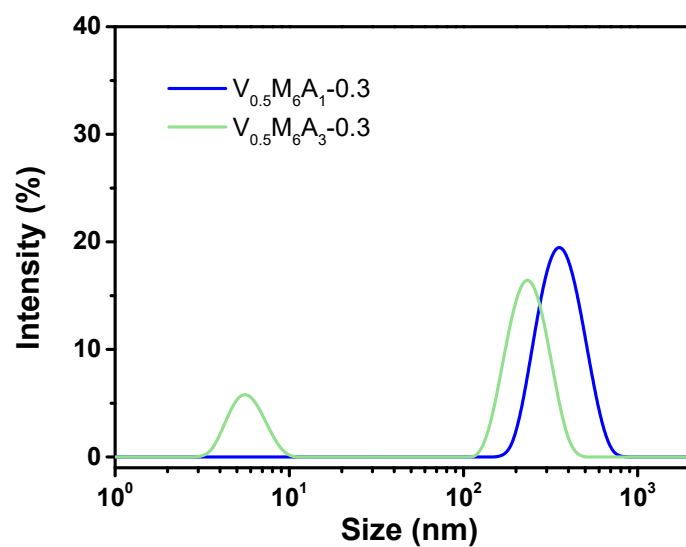

40

41 **Figure S1.** Dynamic light scattering (DLS) measurements for  $V_{0.5}M_6A_1-0.3$  and  $V_{0.5}M_6A_3-0.3$   
 42 copolymers in aqueous solution.

43

44

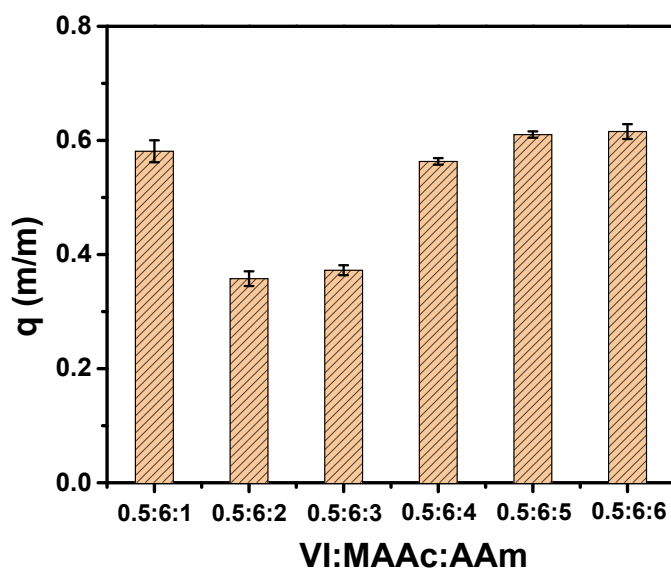

45

46 **Figure S2.** Water contents of P(VI-co-MAAc-co-AAm) copolymer hydrogels at the various  
 47 molar ratios of VI:MAAc:AAm, where  $C_m = 3.5$  M and  $f_{MBAA} = 1$  mol%.

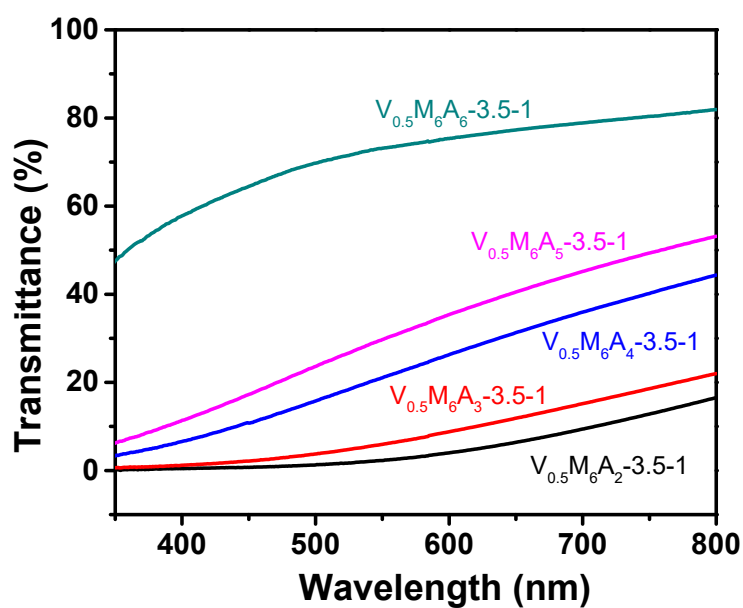

**Figure S3.** Transparency of P(VI-co-MAAc-co-AAc) copolymer hydrogels with various molar ratio of VI:MAAc:AAm.

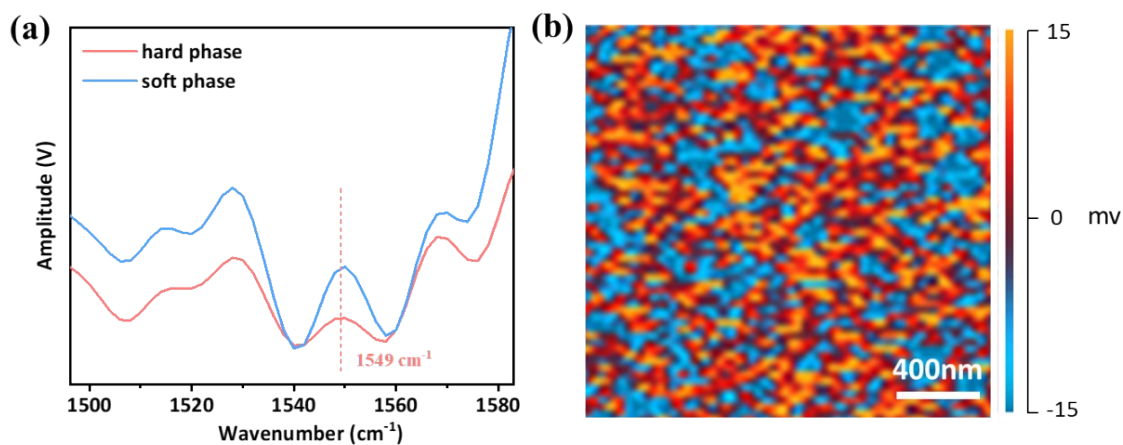

**Figure S4.** (a) The localized IR spectrum collected at the polymer-hard phase and polymer-soft phase. (b) The chemical mapping at fixed wavenumber of  $1549\text{ cm}^{-1}$  highlighting the distributions of VI in the various phases of the  $V_{0.5}M_6A_3-3.5-1$  sample.

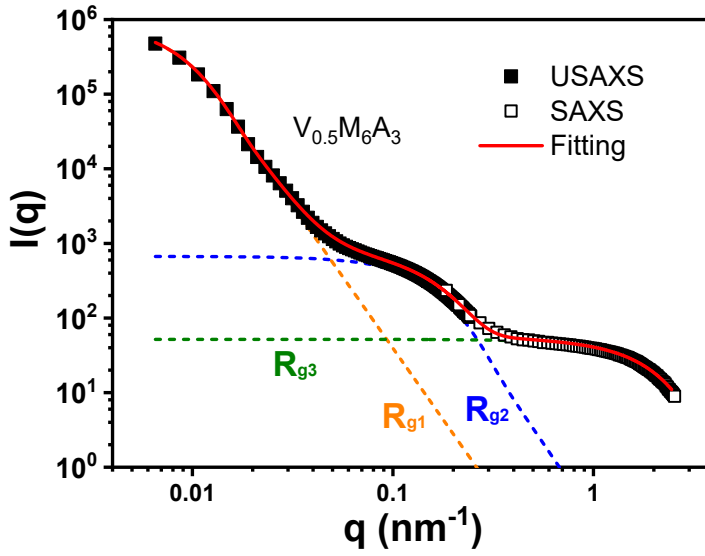

57

58 **Figure S5.** SAXS and USAXS profiles of the  $V_{0.5}M_6A_3$ -3.5-1 hydrogel. The dash line denotes  
59 the fitting results using the unified Guinier/power-law approach,<sup>5-7</sup>

$$I(q) = \sum_{i=1}^N \left( G_i \exp\left(\frac{-q^2 R_{g,i}^2}{3}\right) + \exp\left(\frac{-q^2 R_{g,i+1}^2}{3}\right) B_i q_i^{*-P_i} \right)$$

60

61 where  $G$  is the Guinier prefactor and  $B$  is a prefactor specific to the type of power law  
62 scattering, specified by the regime in which the exponent  $P$ , falls.  $R_{g,i}$  and  $R_{g,i+1}$  describe  
63 average size of large-scale and small-scale structures. And  $q_i^*$  is defined by,

$$q_i^* = \frac{q}{\text{erf}\left(\frac{kqR_{g,i}}{\sqrt{6}}\right)^3}$$

64

65 and the value of  $k$  is 1 for solid structural levels and 1.06 for mass fractal levels. It is apparent  
66 that the scattering curve can be well fitted by the above equation, and three characteristic sizes  
67 were obtained. In the low- $q$  region, the characteristic size  $R_{g1} \sim 410.4$  nm, which closes to the  
68 distance between adjacent polymer-hard phase (or polymer-soft phase) from AFM  
69 nanomechanical mapping, The specific size  $R_{g2} (\sim 31.1$  nm) and  $R_{g3} (\sim 3.01$  nm) may stem from

70 the hydrogen bond aggregates in the polymer-hard phase and polymer-soft phase, respectively.

71

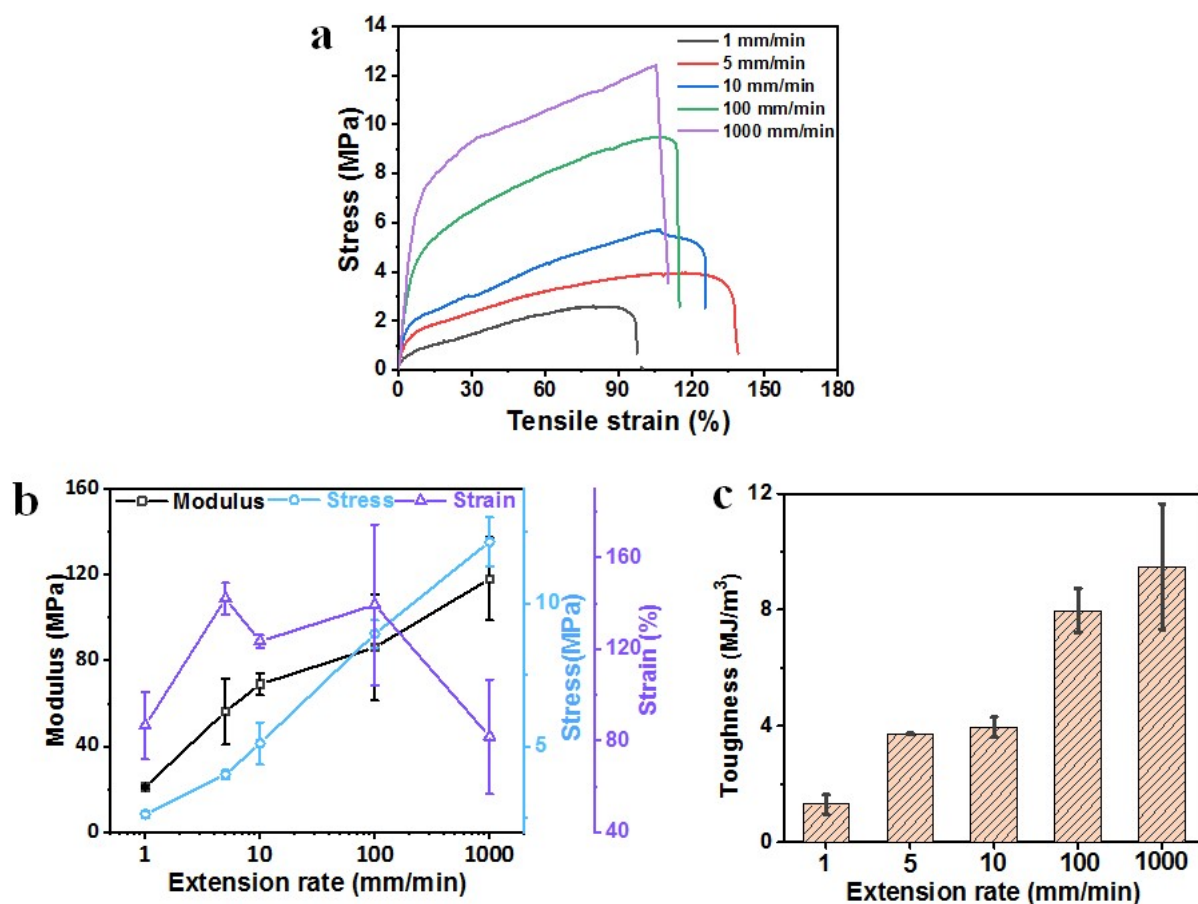

72

73 **Figure S6.** (a) Tensile stress-strain curves of V<sub>0.5</sub>M<sub>6</sub>A<sub>3</sub>-3.5-1 hydrogel at various extension

74 rates. Effects of extension rates on (b) Young's modulus, fracture strength, fracture strain, and

75 (c) toughness.

76

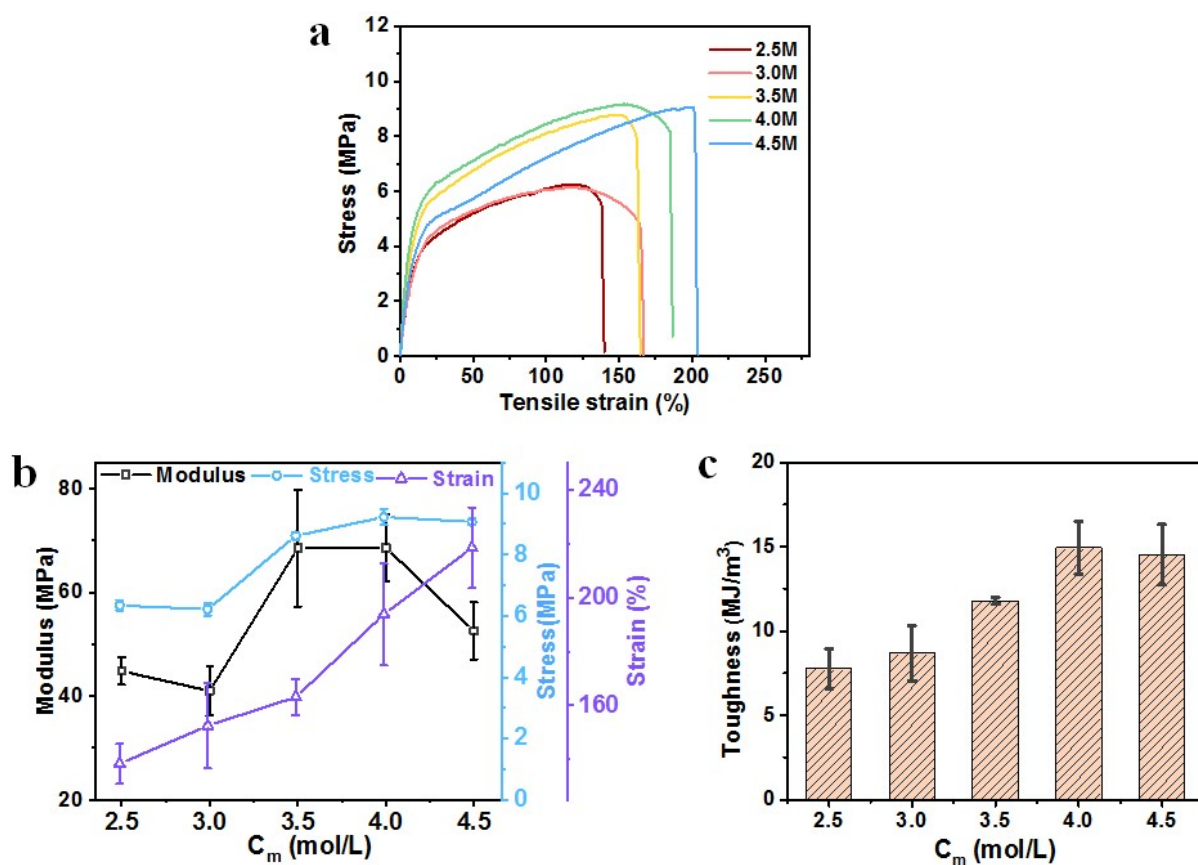

77

78 **Figure S7.** (a) Tensile stress-strain curves of the  $V_{0.5}M_6A_3$  hydrogels with varying monomer  
 79 amounts from 2.5 M to 4.5 M. The effects of various monomer amounts on (b) Young's  
 80 modulus, fracture strength, fracture strain, and (c) toughness, where the crosslinking agent was  
 81 fixed at 1 mol% based on the monomer contents.

82

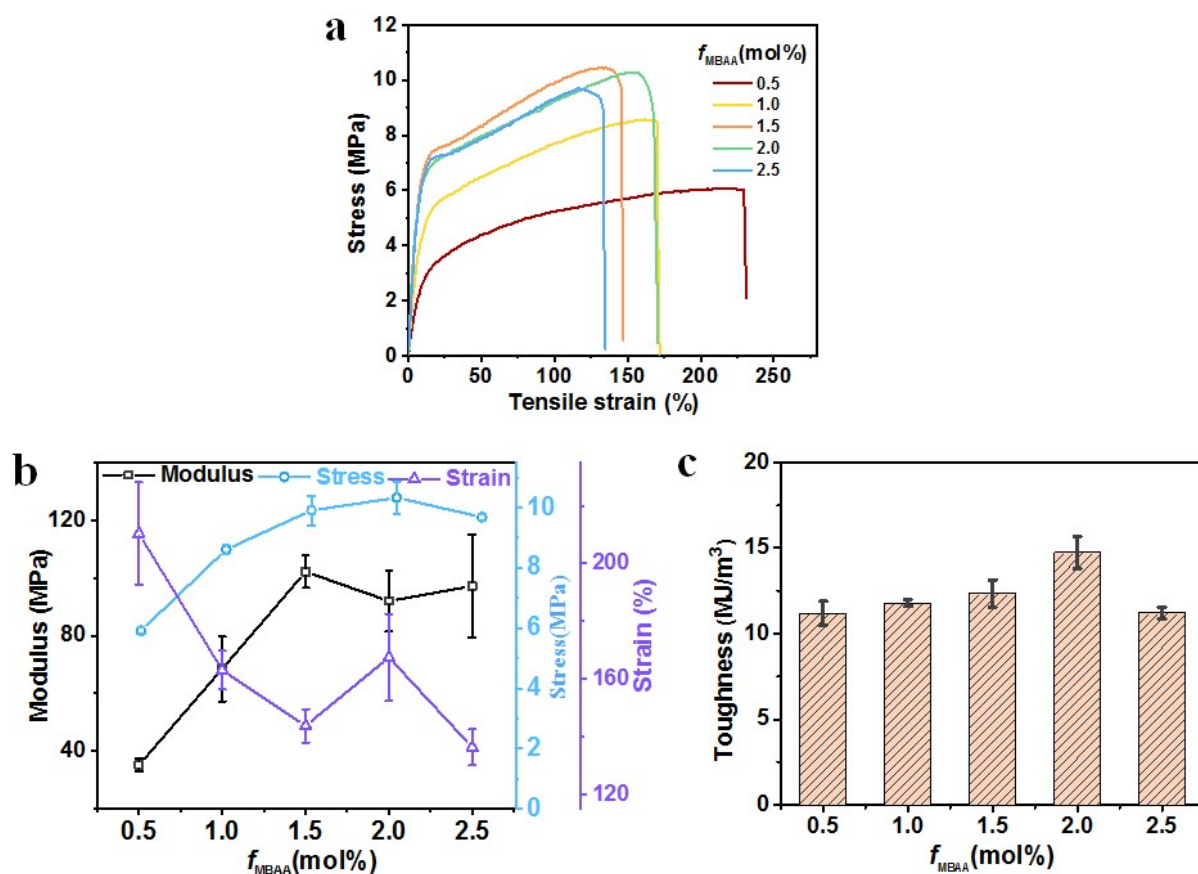

83

84 **Figure S8.** (a) Tensile stress-strain curves of the  $\text{V}_{0.5}\text{M}_6\text{A}_3$  hydrogels with varying crosslinking  
 85 agent contents from 0.5 to 2.5 mol% based on the total monomer amounts. The effects of  
 86 various crosslinking agents on (b) Young's modulus, fracture strength, fracture strain, and (c)  
 87 toughness, where the total monomer amount was fixed at 3.5 M.

88

89

90

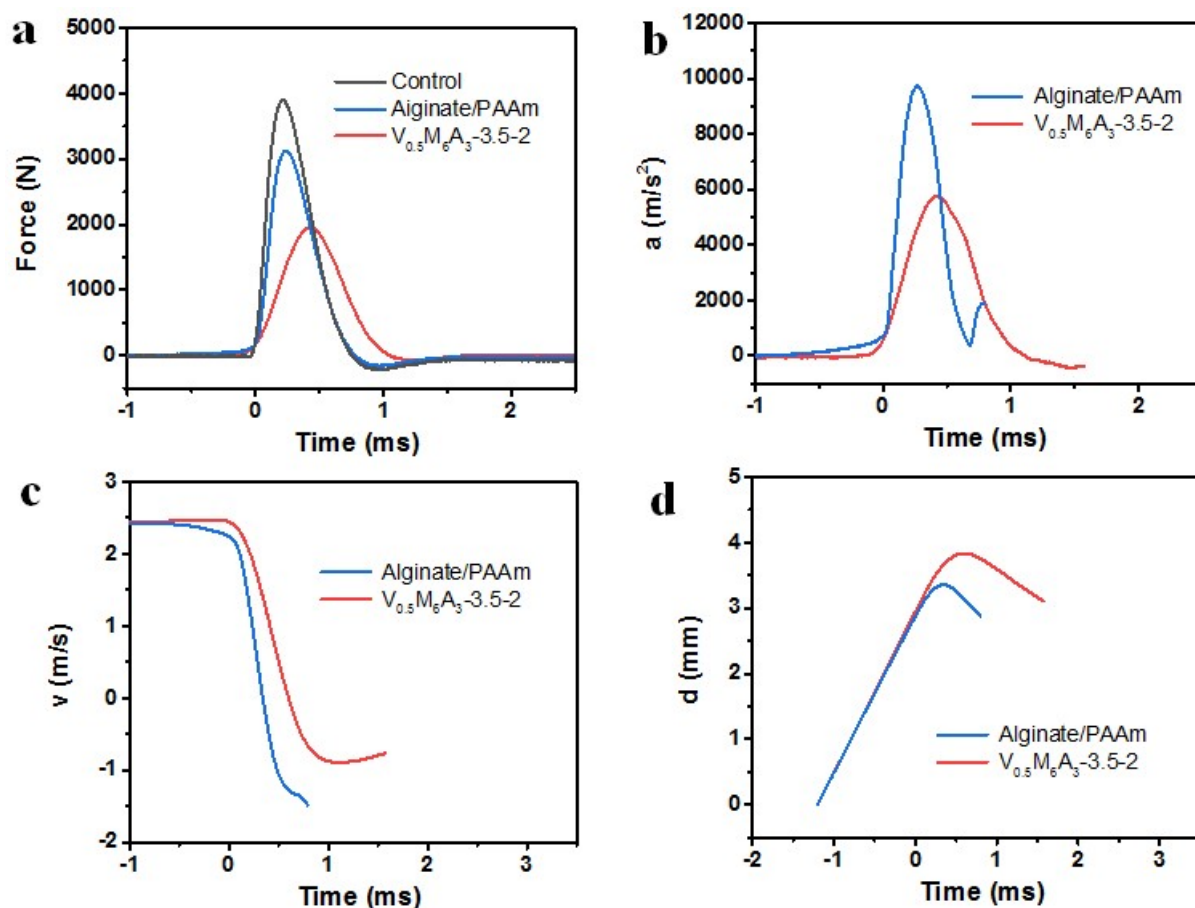

**Figure S9.** The falling hammer tests, (a) force–time, (b) mass acceleration–time, (c) velocity–time and (b) displacement–time curves for the  $V_{0.5}M_6A_3-3.5-2$  and alginate/PAAm double network hydrogel, where the height of falling hammer is 30 cm.

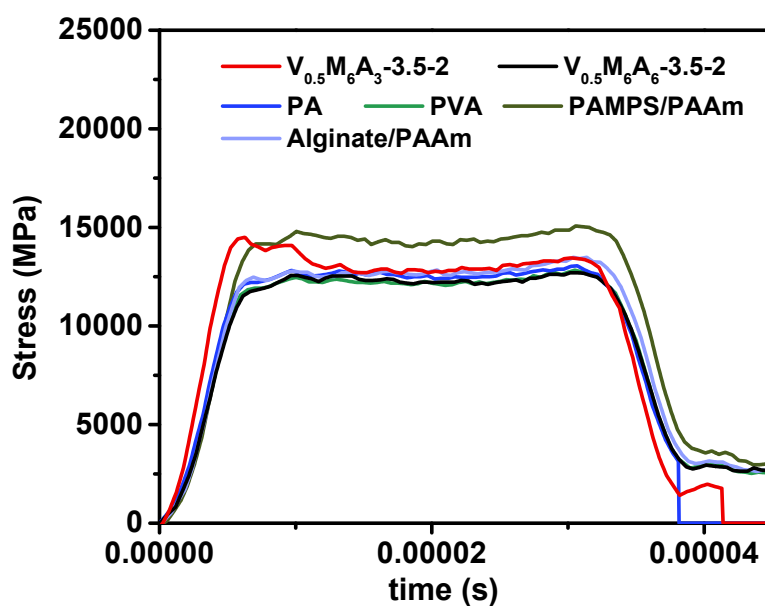

**Figure S10.** Strain rate of SPHB tests.

#### References:

1. J. Y. Sun, X. Zhao, W. R. Illeperuma, O. Chaudhuri, K. H. Oh, D. J. Mooney, J. J. Vlassak and Z. Suo, *Nature*, 2012, **489**, 133-136.
2. J. P. Gong, Y. Katsuyama, T. Kurokawa and Y. Osada, *Advanced Materials*, 2003, **15**, 1155-1158.
3. L. Zhang, J. Zhao, J. Zhu, C. He and H. Wang, *Soft Matter*, 2012, **8**, 10439.
4. T. L. Sun, T. Kurokawa, S. Kuroda, A. B. Ihsan, T. Akasaki, K. Sato, M. A. Haque, T. Nakajima and J. P. Gong, *Nat Mater*, 2013, **12**, 932-937.
5. G. Beaucage and D. W. Schaefer, *Journal of Non-Crystalline Solids*, 1994, **172-174**, 797-805.
6. G. Beaucage, *Journal of Applied Crystallography*, 1995, **28**, 717-728.
7. G. Beaucage, T. Ulibarri, E. Black and D. Schaefer, 1995.
